# Supplementary material for: Self-assembly of Co-doped MnO2 nanorod networks with abundant oxygen vacancy-modified separators for high-performance Li–S batteries
Source: Royal Society of Chemistry journal article supplement (doi:10.1039/d2qi01960d), 2023-01-01
Supplement: d2qi01960d1.pdf [file d2qi01960d1.pdf]

**Electronic Supplementary Information**

**Self-assembly Co-doped MnO<sub>2</sub> nanorods networks with  
abundant oxygen vacancies modified separators for high-  
performance Li-S batteries**

*Chuyue Cai*<sup>1 §</sup>, *Liping Wu*<sup>1 §</sup>, *Zhiwei Cai*<sup>1</sup>, *Fang Yu*<sup>2</sup>, *Liu Zhang*<sup>2</sup>, *Liya Wang*<sup>3</sup>, *Tao Mei*<sup>1</sup>,  
*Liangyou Lin*<sup>1</sup>, and *Xianbao Wang*<sup>1,\*</sup>

*<sup>1</sup>Hubei Collaborative Innovation Center for Advanced Organic Chemical Materials,  
Overseas, Expertise Introduction Center for Discipline Innovation (D18025), Key Laboratory  
for the Green Preparation and Application of Functional Materials, Hubei Key Laboratory of  
Polymer Materials, School of Materials Science and Engineering, Hubei University, Wuhan  
430062, P.R. China*

*<sup>2</sup>School of Materials Science and Engineering, Yancheng Institute of Technology, Yancheng  
224051, P.R. China*

*<sup>3</sup>School of Architecture, Southeast University, Nanjing 210096, P. R. China*

§ These authors contributed equally to this work

\* Corresponding author. Fax: +86 27 8866 1729; Tel.: +86 27 8866 2132.

E-mail: wxb@hubu.edu.cn (X.B. Wang)

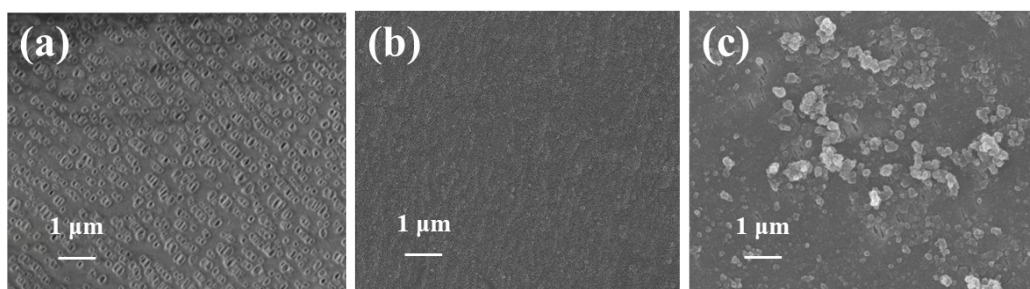

**Fig. S1.** SEM images of (a) PP separator, (b) Co-MnO<sub>x</sub>@PP separator, and (c) MnO<sub>2</sub>@PP separator.

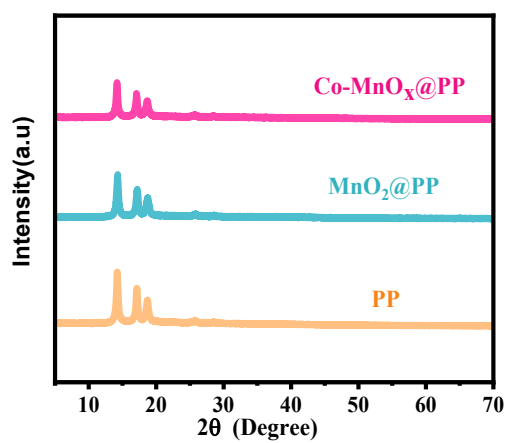

**Fig. S2.** XRD patterns of Co-MnO<sub>x</sub>@PP, MnO<sub>2</sub>@PP and PP separators.

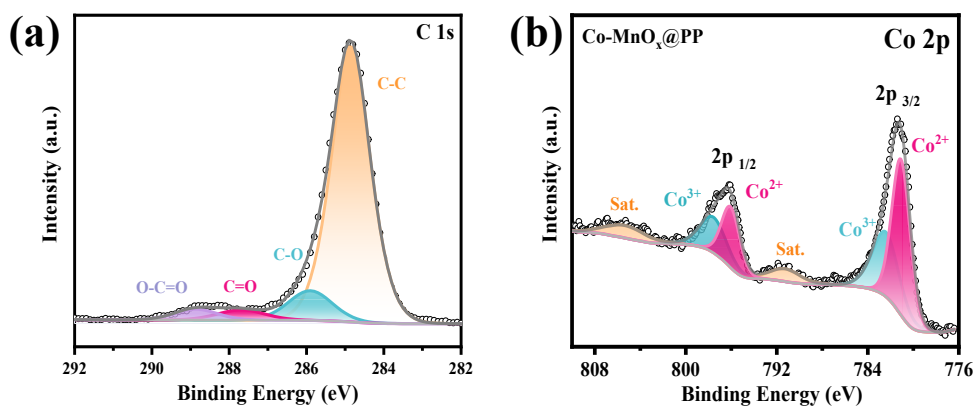

Fig. S3. XPS spectra of (a) C 1s, (b) Co 2p for Co-MnO<sub>x</sub>@PP separators.

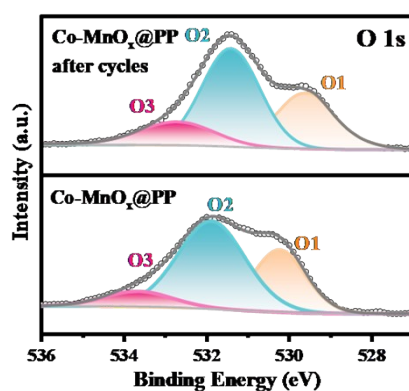

Fig. S4. XPS spectra of O 1s for Co-MnO<sub>x</sub>@PP separators after cycles.

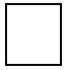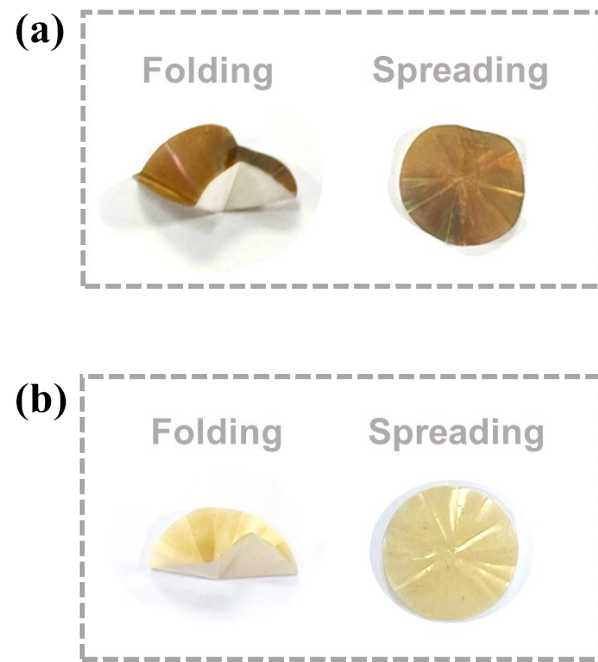

**Fig. S5.** Digital photographs of the folding and spreading test of (a) Co-MnO<sub>x</sub>@PP and (b) MnO<sub>2</sub>@PP separators.

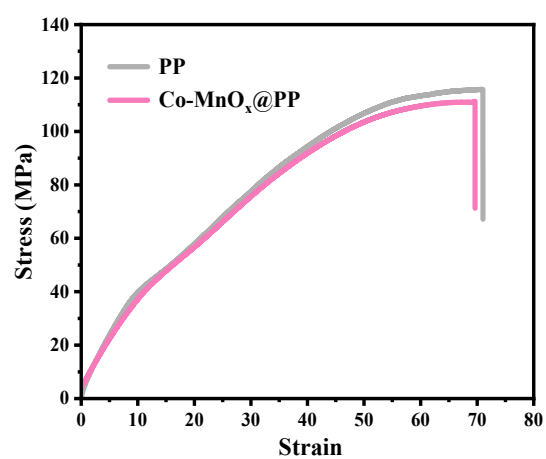

**Fig. S6.** Typical tensile stress-strain curves of commercial PP and Co-MnO<sub>x</sub>@PP separators.

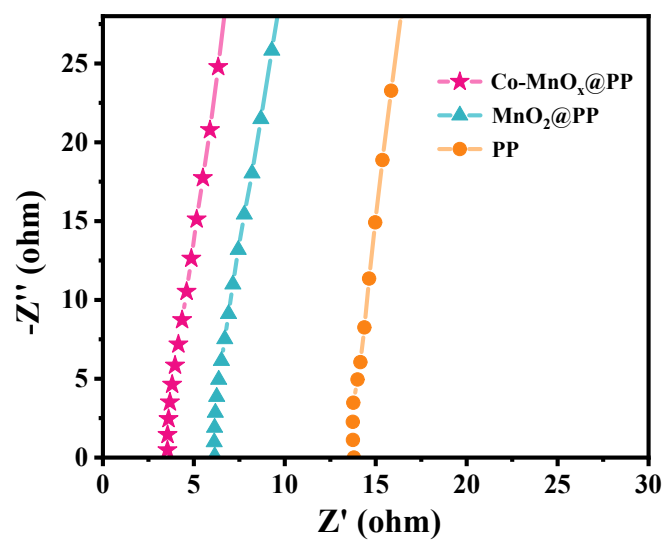

**Fig. S7.** EIS of the lithium symmetric cells with Co-MnO<sub>x</sub>@PP, MnO<sub>2</sub>@PP and PP separators.

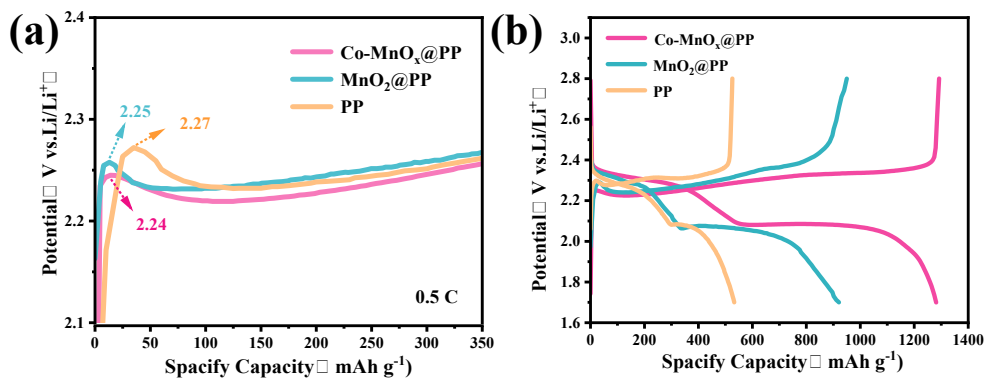

**Fig. S8.** (a) Initial and (b) whole charge/discharge curves of Li-S cells with Co-MnO<sub>x</sub>@PP, MnO<sub>2</sub>@PP and PP separators at 0.5 C.

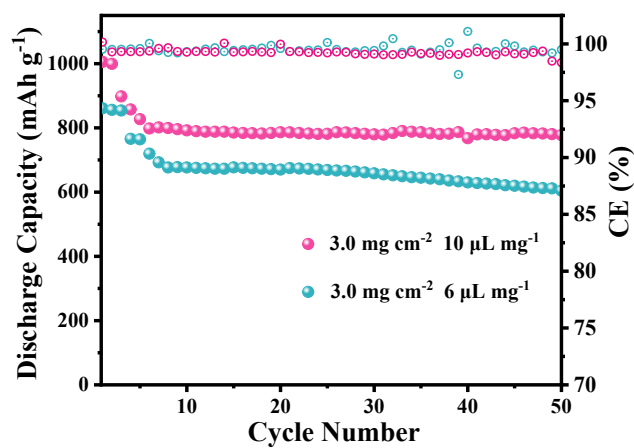

**Fig. S9.** The cycle of Co-MnO<sub>x</sub>@PP modified separator under high sulfur loading and low E/S ratio

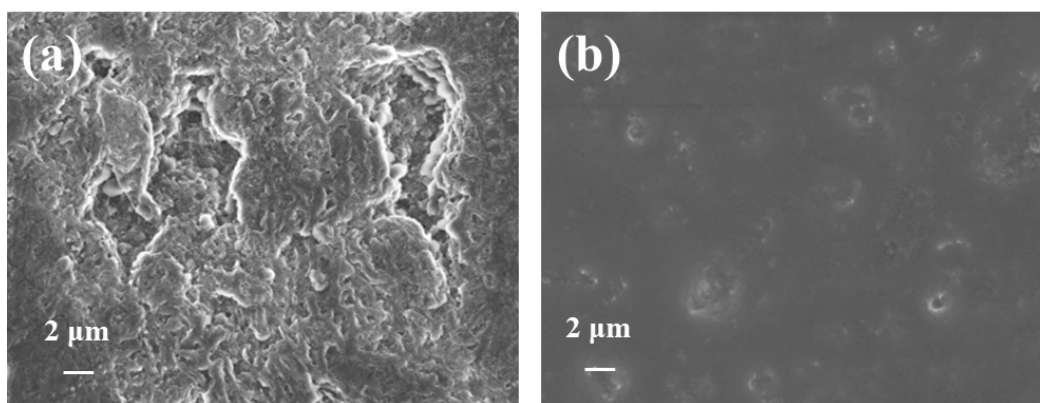

**Fig. S10.** SEM images of Li anode in contact with (a) PP and (b) Co-MnO<sub>x</sub>@PP separators after 100 cycles.

**Table S1.** Summary of electrochemical performance of Li-S batteries configured with different modified separators and interlayers.

| Modified separator                                           | S loading (mg cm <sup>-2</sup> ) | Reversible capacity (mAh g <sup>-1</sup> ) | Capacity retention /cycle number/Rate | Ref.      |
|--------------------------------------------------------------|----------------------------------|--------------------------------------------|---------------------------------------|-----------|
| MnO <sub>2</sub> @PE                                         | 1.5                              | 603                                        | 65 %/500/0.5 C                        | [1]       |
| Fe <sub>3</sub> O <sub>4</sub> /RGO//PP                      | 0.7-1.0                          | 728                                        | 60%/400/1.8 C                         | [2]       |
| Co <sub>3</sub> O <sub>4</sub> @GC/N-CNT NF-coated separator | 2.0                              | 389                                        | 59 %/500/0.5 C                        | [3]       |
| MnO-OVs/NCNTs/PP                                             | 1.5                              | 618                                        | 66 %/500/1 C                          | [4]       |
| MnO <sub>2</sub> separator                                   | 1-1.2                            | 494                                        | 71 %/500/0.5 C                        | [5]       |
| Mn/Co-N-C separator                                          | 1.0                              | 522                                        | 64 %/1000/2 C                         | [6]       |
| NiCo <sub>2</sub> O <sub>4-x</sub> modified separator        | 1.5                              | 327                                        | 53 %/500/2.5 C                        | [7]       |
| CSUST1/CNT_x0002 coated separator                            | 2.0                              | 708                                        | 58 %/600/1 C                          | [8]       |
| Co-MnO <sub>x</sub> @PP                                      | 1.6                              | 902                                        | 84.4 %/200/0.5 C                      | This work |
|                                                              | 1.6                              | 715                                        | 65.3 %/500/3 C                        |           |
|                                                              | 3.0                              | 777                                        | 78.8 %/50/0.5 C                       |           |

## References

1. Song, X.; Chen, G.; Wang, S.; Huang, Y.; Jiang, Z.; Ding, L. X.; Wang, H. Self-Assembled Close-Packed MnO<sub>2</sub> Nanoparticles Anchored on a Polyethylene Separator for Lithium-Sulfur Batteries. *ACS Appl. Mater. Interfaces* 2018, 10 (31), 26274-26282.
2. P. Cheng, P. Guo, D. Liu, Y. Wang, K. Sun, Y. Zhao, D. He, Fe<sub>3</sub>O<sub>4</sub>/RGO modified separators to suppress the shuttle effect for advanced lithium-sulfur batteries, *J. Alloys Compd.* 784 (2019) 149-156.
3. Saroha, R.; Oh, J. H.; Lee, J. S.; Kang, Y. C.; Jeong, S. M.; Kang, D.-W.; Cho, C.; Cho, J. S. Hierarchically porous nanofibers comprising multiple core-shell Co<sub>3</sub>O<sub>4</sub>@graphitic carbon nanoparticles grafted within N-doped CNTs as functional interlayers for excellent Li-S batteries. *Chem. Eng. J.* 2021, 426.
4. Yu, X.; Chen, W.; Cai, J.; Lu, X.; Sun, Z. Oxygen vacancy-rich MnO nanoflakes/N-doped carbon nanotubes modified separator enabling chemisorption and catalytic conversion of polysulfides for Li-S batteries. *J. Colloid Interface Sci.* 610(2022), 407-417
5. Wang, X.; Yang, L.; Wang, Y.; Li, Q.; Chen, C.; Zhong, B.; Chen, Y.; Guo, X.; Wu, Z.; Liu, Y.; Liu, Y.; Sun, Y. Novel functional separator with self-assembled MnO<sub>2</sub> layer via a simple and fast method in lithium-sulfur battery. *J. Colloid Interface Sci.* 606 (1) (2022), 666-676.
6. Qiao, S.; Wang, Q.; Lei, D.; Shi, X.; Zhang, Q.; Huang, C.; Liu, A.; He, G.; Zhang, F. Oxygen vacancy enabled fabrication of dual-atom Mn/Co catalysts for high-



- performance lithium-sulfur batteries. *J. Mater. Chem. A* 10 (21) (2022), 11702-11711.
7. Zhu, Y.; Zuo, Y.; Ye, F.; Zhou, J.; Tang, Y.; Chen, Y. Dual-regulation strategy to enhance electrochemical catalysis ability of NiCo<sub>2</sub>O<sub>4-x</sub> for polysulfides conversion in Li-S batteries. *Chem. Eng. J.* 2022, 428.
  8. Jin, H. G.; Wang, M.; Wen, J. X.; Han, S. H.; Hong, X. J.; Cai, Y. P.; Li, G.; Fan, J.; Chao, Z. S. Oxygen Vacancy-Rich Mixed-Valence Cerium MOF: An Efficient Separator Coating to High-Performance Lithium-Sulfur Batteries. *ACS Appl. Mater. Interfaces* 13 (3) (2021), 3899-3910.
